# Supplementary material for: Food Intake Changes and Their Impact on Quality of Life in Spanish Citizens with and without COVID-19 during Lockdown
Source: Healthcare (Basel). 2022 Jul 28;10(8):1414. doi: 10.3390/healthcare10081414 (PMC9408131; doi:10.3390/healthcare10081414)
Supplement: Supplementary file 1 [file healthcare-10-01414-s001.zip › Supplementary material Table S3.pdf]

**Table S3. Analysis of differences between independent samples in the AEBQ.**

|                               | AEBQ total score during confinement |         |                |
|-------------------------------|-------------------------------------|---------|----------------|
|                               | M±SD                                | Statics | p <sup>a</sup> |
| <b>Sex</b>                    |                                     |         |                |
| <i>before pandemic</i>        |                                     |         |                |
| Men                           | 61,94±7,518                         | 432,000 | <b>0,033</b>   |
| Women                         | 66,17±6,623                         |         |                |
| <i>during pandemic</i>        |                                     | 502,500 | 0,409          |
| Men                           | 61,05±12,853                        |         |                |
| Women                         | 60,56±5,371                         |         |                |
| <b>COVID-19</b>               |                                     |         |                |
| <i>before pandemic</i>        |                                     |         |                |
| People who were not diagnosed | 65,41±7,067                         | 852,000 | 0,914          |
| People who were diagnosed     | 64,93±7,002                         |         |                |
| <i>during pandemic</i>        |                                     |         |                |
| No                            | 62,46±13,469                        | 415,000 | <b>0,001</b>   |
| Yes                           | 58,00±5,831                         |         |                |
| <b>Range of age</b>           |                                     |         |                |
| <i>before pandemic</i>        |                                     |         |                |
| 18-29 years                   | 66,28±7,395                         | 681,500 | 0,075          |
| 30-68 years                   | 64,00±6,459                         |         |                |
| <i>during pandemic</i>        |                                     |         |                |
| 18-29 years                   | 62,88±11,825                        | 537,000 | <b>0,012</b>   |
| 30-68 years                   | 58,49±10,936                        |         |                |
| <b>Place of residence</b>     |                                     |         |                |
| <i>before pandemic</i>        |                                     |         |                |
| North                         | 64,33±6,429                         | 3,279   | 0,194          |
| Center                        | 64,64±7,442                         |         |                |
| South                         | 70,50±2,121                         |         |                |
| <i>during pandemic</i>        |                                     |         |                |
| North                         | 63,00±8,888                         | 1,918   | 0,383          |
| Center                        | 57,55±5,475                         |         |                |
| South                         | 59,00±0,000                         |         |                |
| <b>Physical activity</b>      |                                     |         |                |
| <i>Before pandemic</i>        |                                     |         |                |
| 4 or more hours per week      | 64,74±6,488                         | 1,319   | 0,725          |
| 2-3 hours per week            | 66,77±66,704                        |         |                |
| 1 hour per week               | 64,10±6,774                         |         |                |
| No physical exercise          | 65,31±6,411                         |         |                |

***during confinement***

7,225

0,065

*Less than usual*

61,80±9,279

*As before*

64,20±7,569

*More than before*

61,93±12,795

*No physical activity*

54,23±14,613

---

Adult Eating Behaviour Questionnaire, AEBQ.
